# Supplementary material
Source: PubMed Central journal article supplement (PMC3157255)

**(1) MG-63**

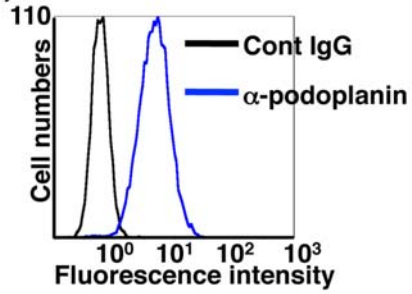

**(2) HOS**

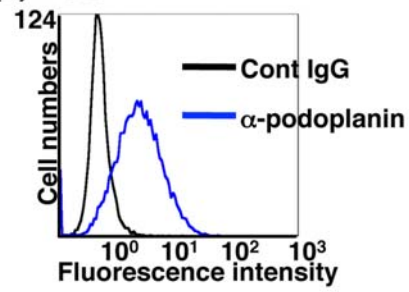

**(3) U2-OS**

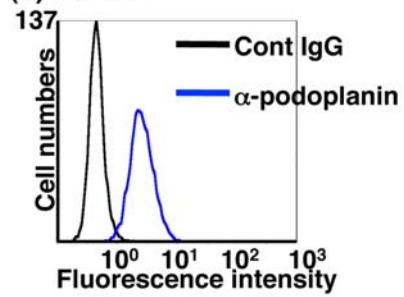

**Figure S1**

Supplement: mmc1.pdf [file mmc1.pdf]

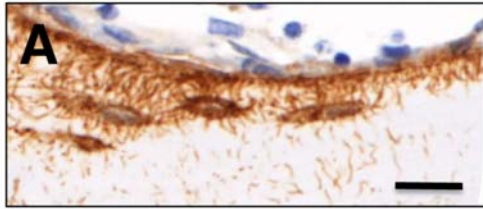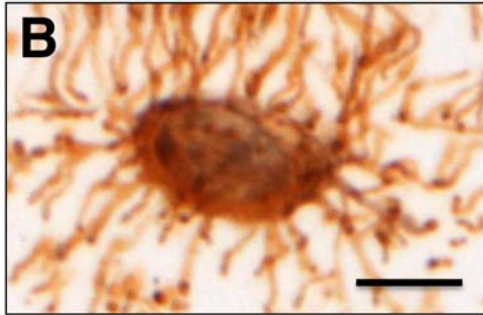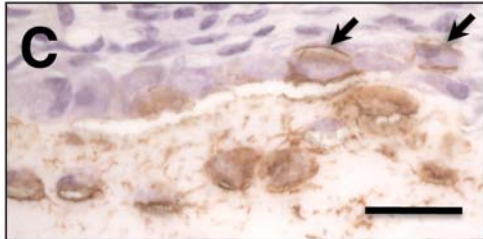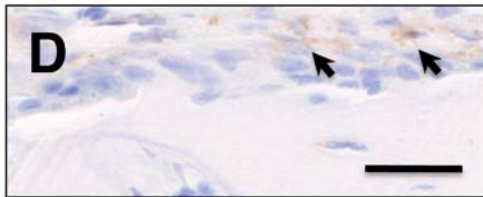

**Figure S2**

Supplement: mmc2.pdf [file mmc2.pdf]

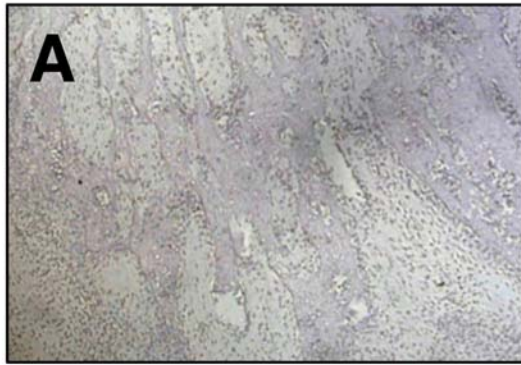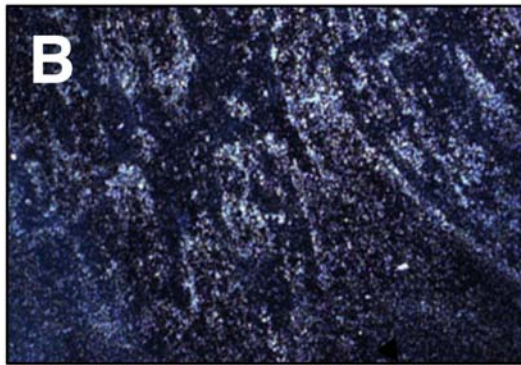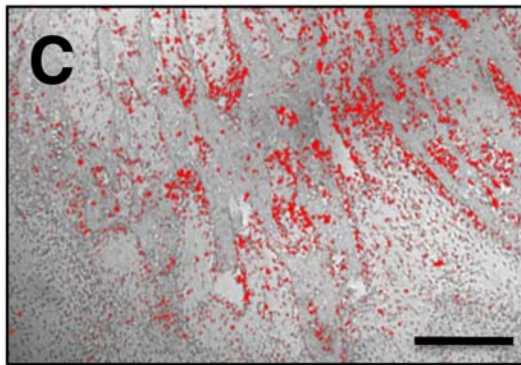

**Figure S3**

Supplement: mmc3.pdf [file mmc3.pdf]
